# Supplementary material
Source: PubMed Central journal article supplement (PMC4466920)
Supplement: ijcep0008-3491-f7.pdf [file ijcep0008-3491-f7.pdf]

# Involvement of CB2R in the regulation of fibrogenesis of skeletal muscle injury

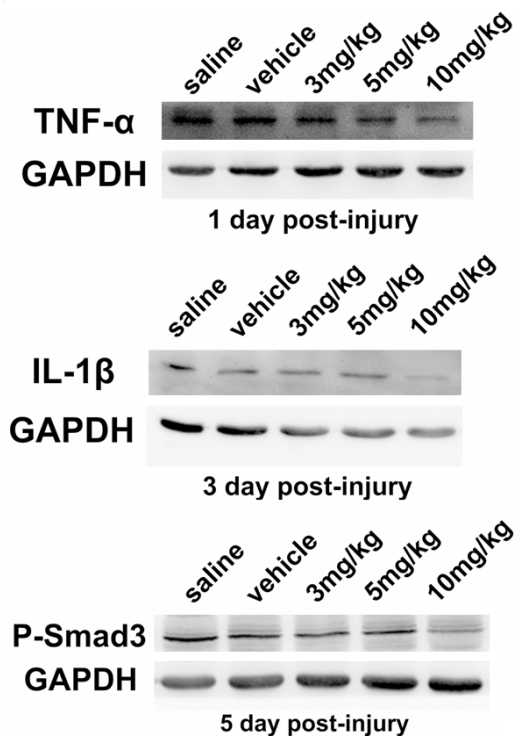

**Figure S1.** Western-blotting was employed to compare the expressions of TNF- $\alpha$  (dilution 1:500; ab9755, Abcam, Cambridge, UK), IL-1 $\beta$  (dilution 1:500; PAB16928, Abnova, Taipei, Taiwan), P-Smad3 and GAPDH between saline and Vehicle group, and the effects of Gp1a at 3, 5, 10 mg/kg. No significant differences were observed in the expression of TNF- $\alpha$ , IL-1 $\beta$  or P-Smad3 between saline and Vehicle group. Treatment with Gp1a at 10 mg/kg significantly decreased these cytokines production.
